# Supplementary material
Source: ML conference proceedings conference paper supplement (https://proceedings.neurips.cc/paper_files/paper/2020/hash/9f655cc8884fda7ad6d8a6fb15cc001e-Abstract.html)

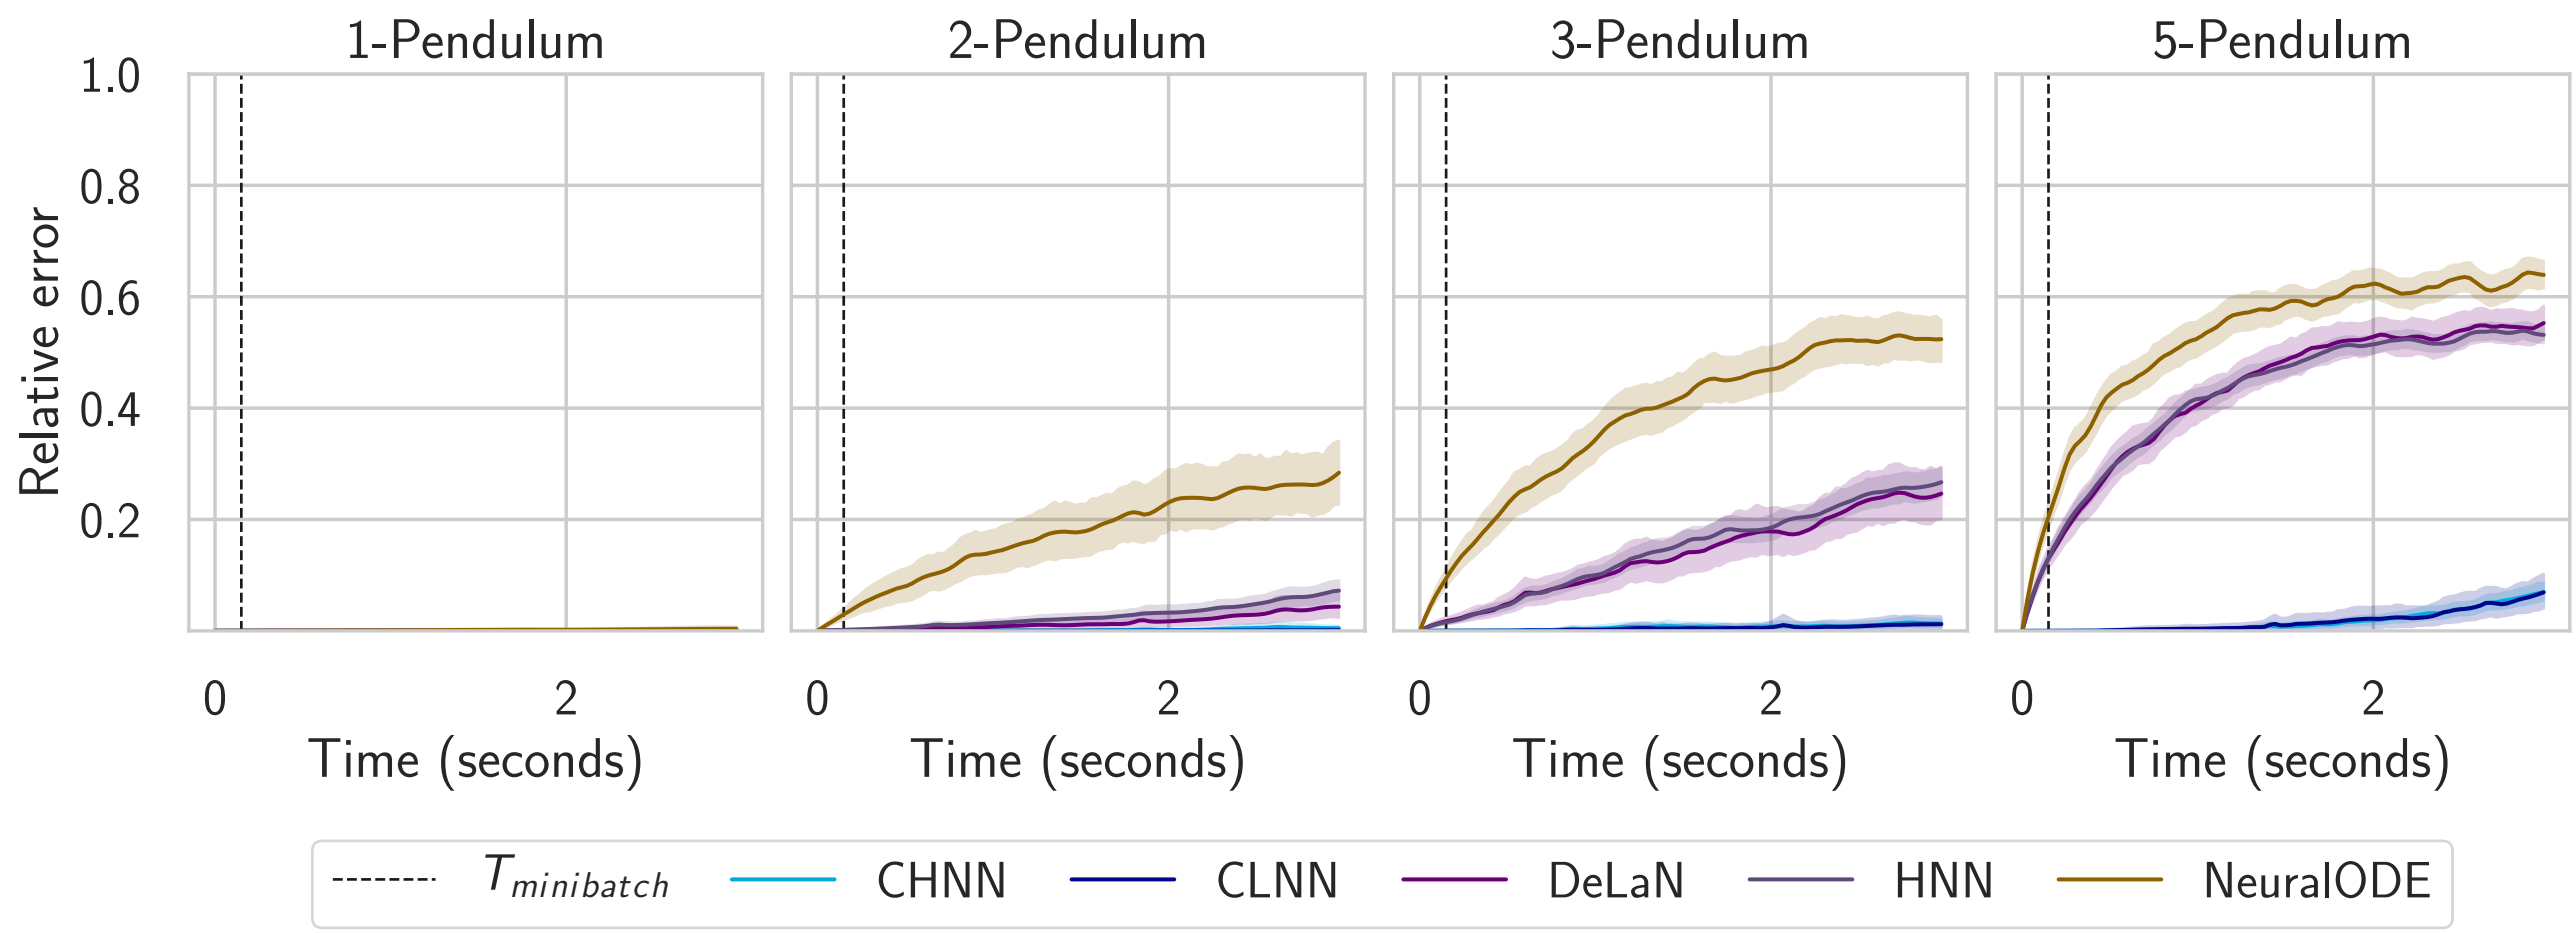

Supplement: Supplementary file [file 9f655cc8884fda7ad6d8a6fb15cc001e-Supplemental.zip]
