# Supplementary material
Source: ML conference proceedings conference paper supplement (https://proceedings.neurips.cc/paper_files/paper/2020/hash/9f655cc8884fda7ad6d8a6fb15cc001e-Abstract.html)
Supplement: Supplementary file [file 9f655cc8884fda7ad6d8a6fb15cc001e-Supplemental.zip]

# Prediction over 100 timesteps

Geom. mean. of rel. err.

$10^{-1}$

$10^{-3}$

$10^{-5}$

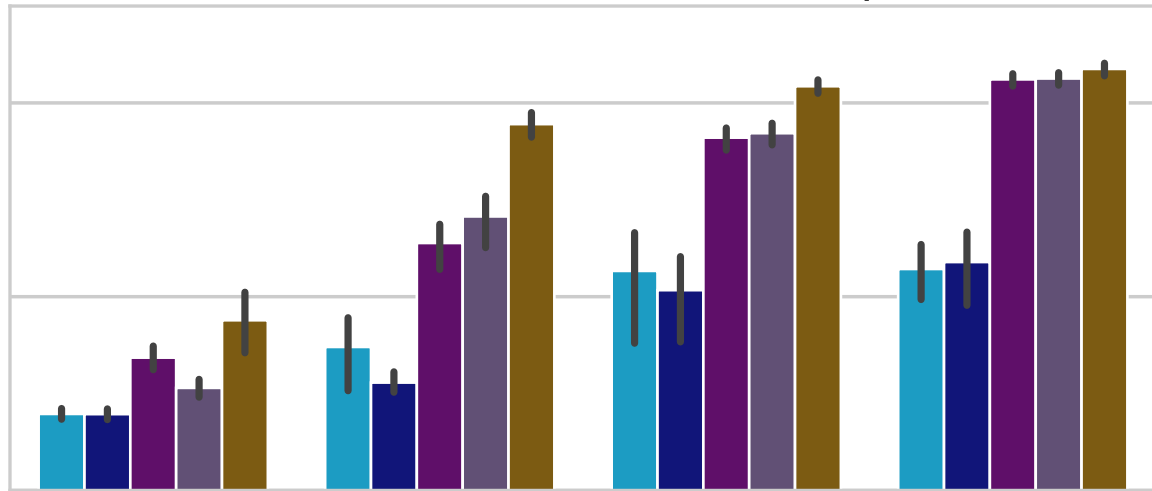

CHNN

CLNN

DeLaN

HNN

NeuralODE
