# Supplementary material
Source: ML conference proceedings conference paper supplement (https://proceedings.neurips.cc/paper_files/paper/2020/hash/9f655cc8884fda7ad6d8a6fb15cc001e-Abstract.html)

Rel. err. in true energy

1-Pendulum

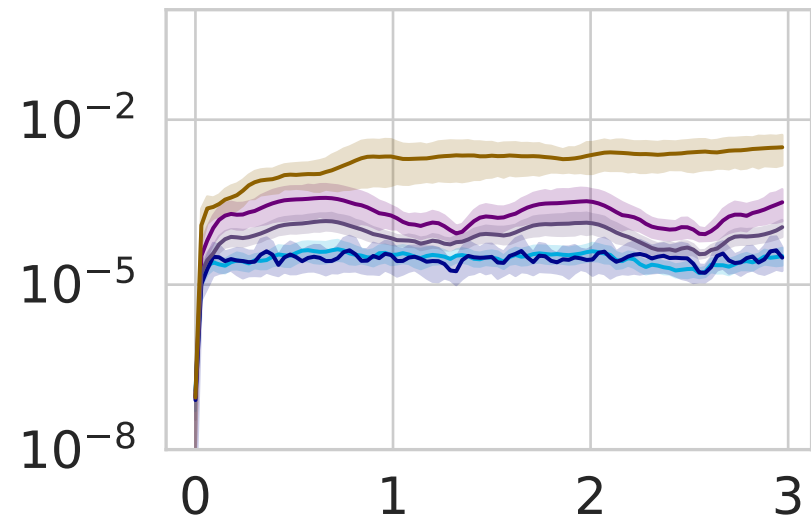

2-Pendulum

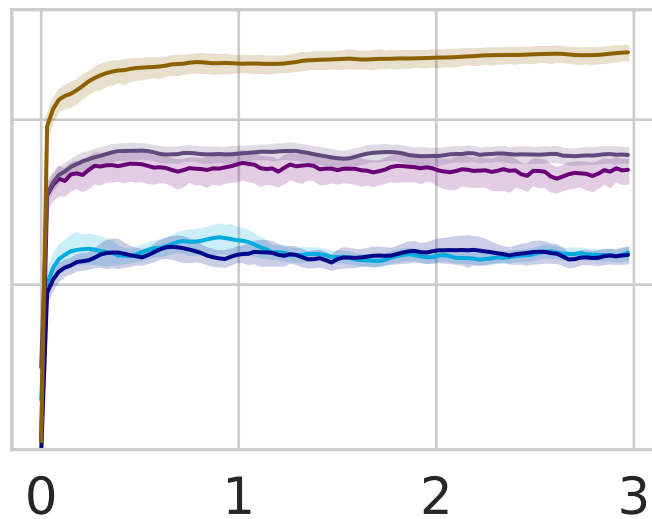

3-CoupledPendulum

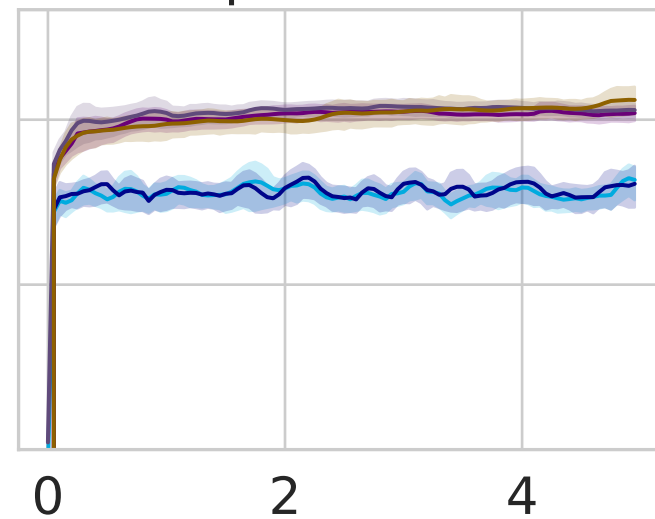

3-Pendulum

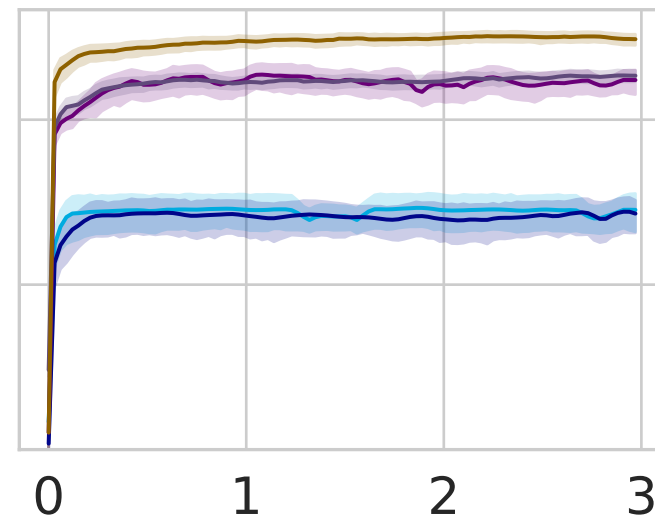

4-CoupledPendulum

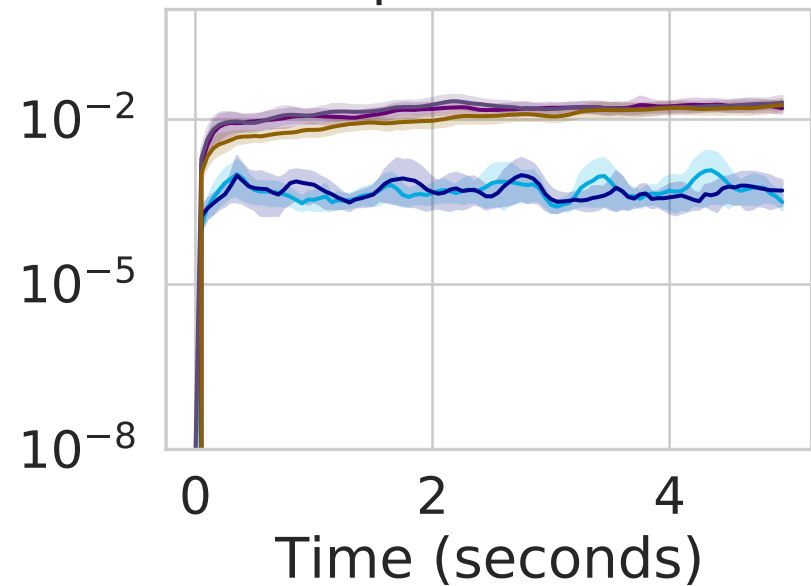

5-Pendulum

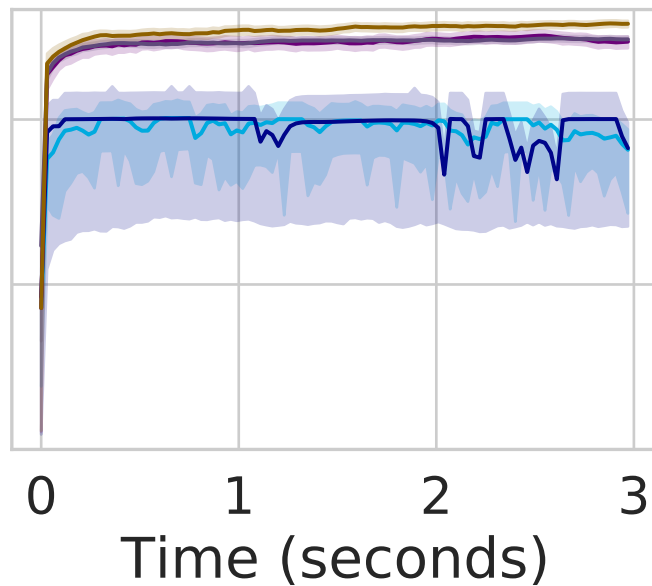

Gyroscope

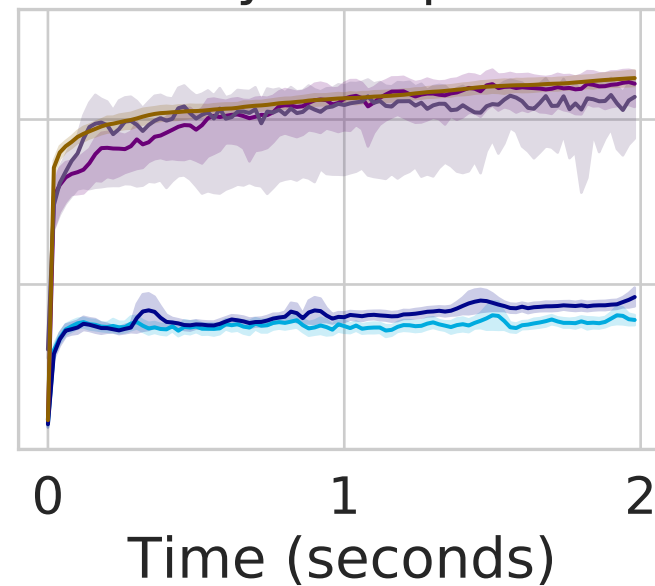

MagnetPendulum

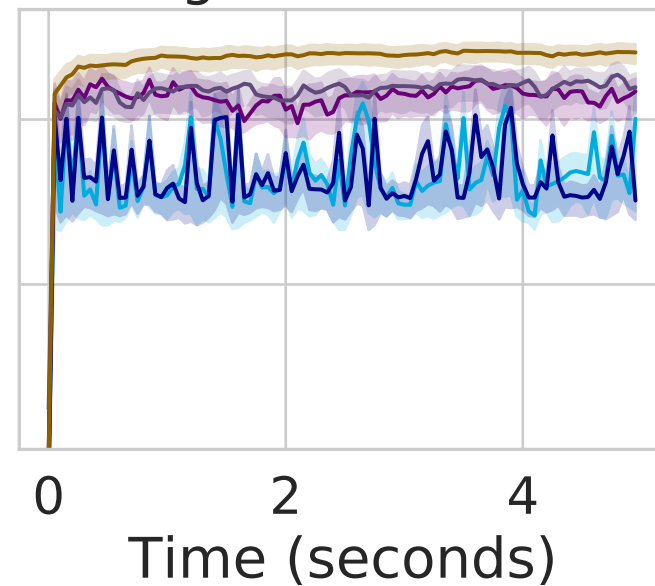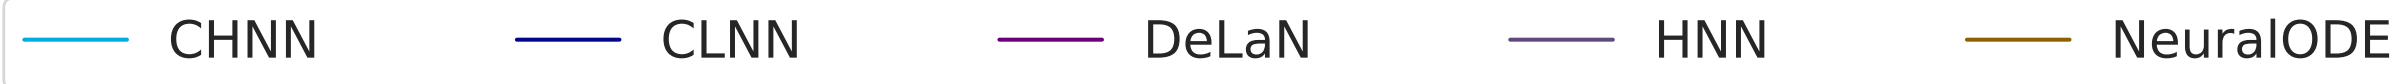

Supplement: Supplementary file [file 9f655cc8884fda7ad6d8a6fb15cc001e-Supplemental.zip]
